# Supplementary material for: Strategies of Modelling Incident Outcomes Using Cox Regression to Estimate the Population Attributable Risk
Source: MDPI journal article supplement (doi:10.3390/ijerph20146417), 2023-07-20
Supplement: s1 [file s1]

Supplementary Table S1. Pairwise Spearman correlation coefficients between age, sex, low physical activity, smoking, alcohol use and hypertension.

| Variables          | R <sub>Sp</sub> (95% CI)       | *Pvalue          |
|--------------------|--------------------------------|------------------|
| AGE vs. SEX        | -0.033 (-0.078, 0.011)         | 0.1425           |
| <b>AGE vs. LPA</b> | <b>0.217 (0.174, 0.259)</b>    | <b>&lt;.0001</b> |
| AGE vs. SMK        | 0.012 (-0.033, 0.056)          | 0.6116           |
| AGE vs. ALC        | 0.008 (-0.037, 0.052)          | 0.742            |
| <b>AGE vs. HYT</b> | <b>0.251 (0.209, 0.292)</b>    | <b>&lt;.0001</b> |
| SEX vs. LPA        | -0.067 (-0.111, -0.022)        | 0.0033           |
| <b>SEX vs. SMK</b> | <b>-0.164 (-0.207, -0.120)</b> | <b>&lt;.0001</b> |
| <b>SEX vs. ALC</b> | <b>-0.337 (-0.376, -0.296)</b> | <b>&lt;.0001</b> |
| SEX vs. HYT        | 0.010 (-0.035, 0.054)          | 0.6728           |
| LPA vs. SMK        | 0.027 (-0.018, 0.072)          | 0.2395           |
| <b>LPA vs. ALC</b> | <b>0.136 (0.091, 0.179)</b>    | <b>&lt;.0001</b> |
| <b>LPA vs. HYT</b> | <b>0.110 (0.066, 0.154)</b>    | <b>&lt;.0001</b> |
| <b>SMK vs. ALC</b> | <b>0.439 (0.402, 0.474)</b>    | <b>&lt;.0001</b> |
| SMK vs. HYT        | 0.017 (-0.028, 0.062)          | 0.4585           |
| <b>ALC vs. HYT</b> | <b>0.129 (0.085, 0.173)</b>    | <b>&lt;.0001</b> |

\*Pvalue for H0: R<sub>Sp</sub> = 0, **AGE**: Baseline age coded as continuous, **SEX**: Women coded as 1, **LPA**: Low physical activity Index, **SMK**: ever smoking, **ALC**: ever use of alcohol, **HYT**: hypertension
